# Supplementary material for: Isothermal solid-phase recombinase polymerase amplification on microfluidic digital versatile discs (DVDs)
Source: Royal Society of Chemistry journal article supplement (doi:10.1039/c5ra02778k), 2015-01-01
Supplement: c5ra02778k1.pdf [file c5ra02778k1.pdf]

## SUPPLEMENTARY INFORMATION

### Disc structure

The DVD-based bioanalytical platform consists on a multi-layer disc, as it is described in Figure SI.1. The bottom layer is a standard DVD disc, composed of two thick-polycarbonate substrates and a middle layer of highly reflective metallic material. The upper layer is the microfluidic substrate composed by pressure sensitive adhesive foil and a disc-shape polycarbonate plastic. The holes, channels, and reservoirs have been fabricated on this substrate. Finally, the inlet holes (sample/reagent loading) and outlet holes (waste removing) are sealed with an inert tape.

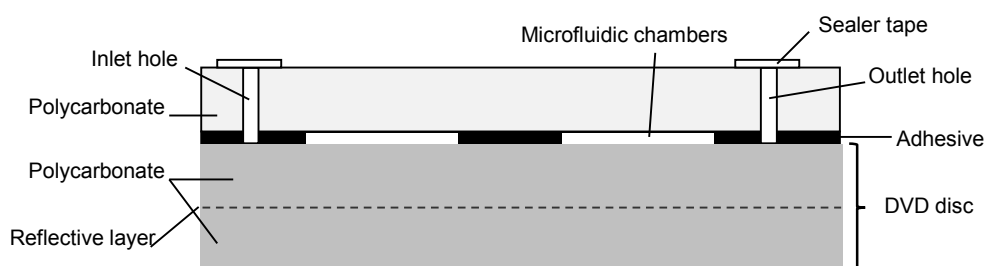

Figure SI.1: Scheme of the optical disc containing microfluidic structures.

### Solid-phase amplification on disc

The isothermal amplification was based on solid-phase recombinase polymerase amplification (RPA) in the reaction chamber. For that, the forward primer (FP-I) was immobilized on the DVD following a microarray format via streptavidin-biotin interaction. The sample and other reaction components were dispensed in the liquid phase to the reaction chamber by centrifugation. This reaction mixture included digoxigenin-labelled forward primer (Dig-FP-S) and the reverse primer (RP). Table SI.1 shows the oligonucleotide sequences of primers used.

Table SI.1: List of oligonucleotides. RP: reverse primer, FP-I: forward primer immobilized on DVD surface, FP-S: forward primer in solutions, C: controls.

| Gen               | Use  | Sequence 5'-3'                                    | Len | Tm   | ref |
|-------------------|------|---------------------------------------------------|-----|------|-----|
| <b>Control</b>    |      |                                                   |     |      |     |
|                   | C-   | [Btntg]-T10-AGGGTCGTACACCGGCTGTAATCAAA            | 46  | 75.9 | own |
|                   | C+   | [DIG]-T10-TTTTTGTCATGGGCCTCGTGTGCGGAAAACC-[Btntg] | 40  | 81.0 | own |
| <b>Endogenous</b> |      |                                                   |     |      |     |
| <i>Lel</i>        | FP-I | [Btntg]-T10-CGAAGCTGGCAACGCTACCGGTT               | 33  | 74.1 | [a] |
| <i>Lel</i>        | FP-S | [DIG]-TCCACCCCATCCACATTT                          | 19  | 59.2 | [a] |
| <i>Lel</i>        | RP   | GGCATAGAAGGTGAAGTTGAAGGA                          | 24  | 58.8 | [a] |
| <i>adh1</i>       | FP-I | [Btntg]-T10-CCTCACCAGTTACGAAACCAATCGATCCAA        | 35  | 67.1 | own |
| <i>adh1</i>       | FP-S | [DIG]-CGTCGTTTCCCATCTCTTCTCC                      | 23  | 64.2 | [a] |
| <i>adh1</i>       | RP   | CCACTCCGAGACCCTCAGTC                              | 20  | 63.5 | [a] |
| <i>Lat52</i>      | FP-I | [Btntg]-T10-ACTCTCTTTCAGTCCTCCCTTGGG              | 25  | 66.8 | own |
| <i>Lat52</i>      | FP-S | [DIG]-AGACCACGAGAACGATATTTGC                      | 22  | 58.4 | [b] |
| <i>Lat52</i>      | RP   | TTCTTGCCTTTTCATATCCAGACA                          | 24  | 57.6 | [b] |
| <b>Screening</b>  |      |                                                   |     |      |     |
| p35S              | FP-I | [Btntg]-T10-ATATAGAGGAAGGGTCTTGCGAAGGATA          | 35  | 64.8 | own |
| p35S              | FP-S | [DIG]-CCACGTCTTCAAAGCAAGTGG                       | 21  | 59.8 | [c] |
| p35S              | RP   | TCCCTCCAAATGAAATGAACTTCC                          | 25  | 59.7 | [c] |
| tNOS              | FP-I | [Btntg]-T10-GCGTATTAATGTATAATTGCGGGACT            | 27  | 63.7 | own |
| tNOS              | FP-S | [DIG]-GCATGACGTTATTTATGAGATGGG                    | 24  | 59.3 | [c] |
| tNOS              | RP   | GACACCGCGCGGATAATTTATCC                           | 24  | 64.4 | [c] |
| <b>Construct</b>  |      |                                                   |     |      |     |
| Bt-11             | FP-I | [Btntg]-T10-TTCTGGGTTACTCAAGCAGTTGTATGG           | 30  | 66.6 | own |
| Bt-11             | FP-S | [DIG]-AAAAGACCACAACAAGCCGC                        | 20  | 58.4 | [a] |
| Bt-11             | RP   | CAATGCGTTCTCCACCAAGTACT                           | 23  | 62.9 | [a] |

[Btntg]: Biotin with triethylene glycol spacer; T10: Thymine tail (10 nucleotides); [Dig]: digoxigenin

Then, the initial amplification (in solution) was followed by the extension of immobilized primers (solid-phase reaction) and the formation of attached digoxigenin-labelled product (Dig-product). As the FP-I was designed to be specific for a region located within the first product, the heminested approach led to a shorter immobilised product than that formed in the liquid phase. Selectivity and sensitivity of this amplification method is improved compared to conventional solid-phase approaches [d]. Figure SI.2 shows the amplification principle on disc.

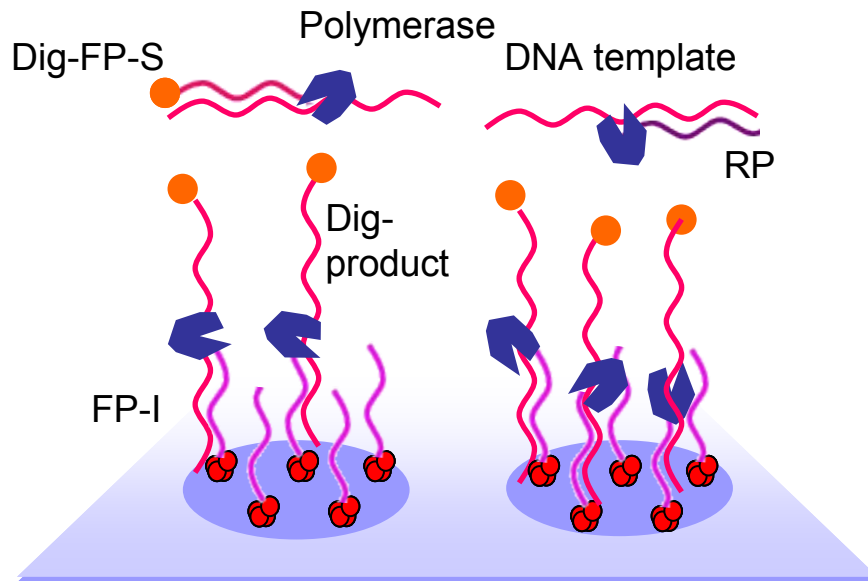

Figure SI.2: Scheme of solid-phase isothermal amplification on disc based on RPA.

[a] International Organization for Standardization, Geneva, Switzerland (2005) ISO 21570:2005. Foodstuffs-methods of analysis for the detection of genetically modified organisms and derived products-quantitative nucleic acid based methods

[b] L. Yang, A. Pan, J. Jia, J. Ding, J. Chen, H. Cheng, C. Zhang, D. Zhang. *J. Agr. Food Chem.*, 2005, **53**, 183-190.

[c] International Organization for Standardization, Geneva, Switzerland (2005) ISO 21569:2005. Foodstuffs-methods of analysis for the detection of genetically modified organisms and derived products-qualitative nucleic acid based methods.

[d] S. Santiago-Felipe, L. A. Tortajada-Genaro, S. Morais, R. Puchades, A. Maquieira, *Sensor. Actuat. B-Chem.*, 2014, **204**, 273-281.
